# Supplementary material for: Genome-Wide Identification and Characterization of the VQ Motif-Containing Gene Family Based on Their Evolution and Expression Analysis under Abiotic Stress and Hormone Treatments in Foxtail Millet (Setaria italica L.)
Source: MDPI journal article supplement (doi:10.3390/genes14051032), 2023-04-30
Supplement: s1 [file s1]

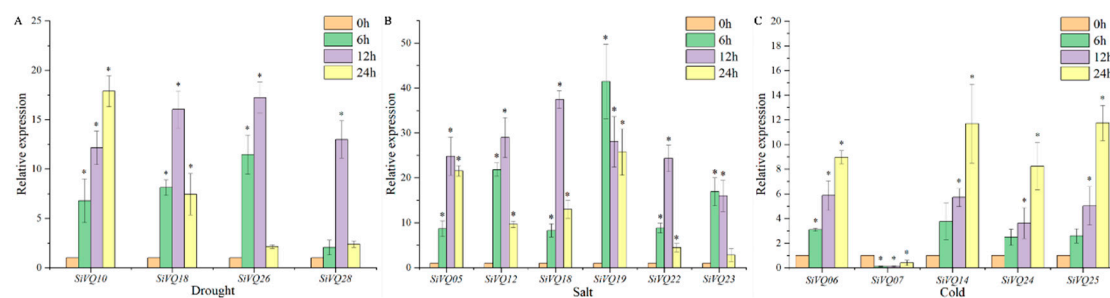

Figure S1. Expression analysis of significantly induced *SiVQ* genes under abiotic stress based on qRT-PCR. A PEG 6000, B NaCl, C 4 °C.

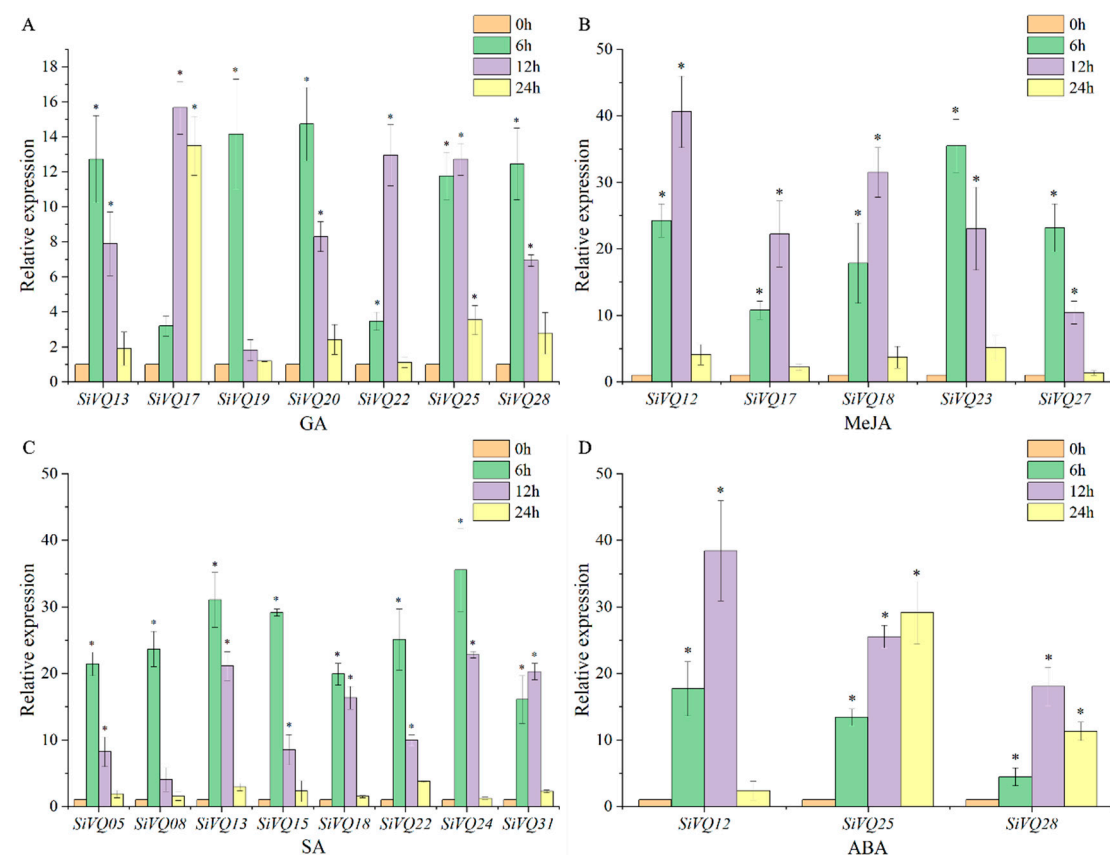

Figure S2. Expression analysis of significantly induced *SiVQ* genes under hormone treatments based on qRT-PCR. A Gibberellin (GA), B Methyl jasmonate (MeJA), C Salicylic acid (SA) and D Abscisic acid (ABA).
