# Supplementary material for: Genome-Wide Identification and Characterization of the VQ Motif-Containing Gene Family Based on Their Evolution and Expression Analysis under Abiotic Stress and Hormone Treatments in Foxtail Millet (Setaria italica L.)
Source: Genes (Basel). 2023 Apr 30;14(5):1032. doi: 10.3390/genes14051032 (PMC10218184; doi:10.3390/genes14051032)
Supplement: Supplementary file 1 [file genes-14-01032-s001.zip › Supplemental Table.xlsx]

## Sheet: Table S1
Table S1. Primers used for qRT-PCR in this study.
Primer name	Primer sequences (5'-3')
SiVQ01-F	GCAGGGCTGCCACTATTA
SiVQ01-R	AGAACAGGTCCGAGAAGTCGT
SiVQ02-F	CTCAGCCAAGCTTCTTCCAC
SiVQ02-R	GAACCGCGTCTCGATGTAG
SiVQ03-F	CTCGCACAAGGTCAGGAAGC
SiVQ03-R	GACCAGCGCCATGAAGTCC
SiVQ05-F	GGTCGAGCTCTGAATTATTCTAC
SiVQ05-R	ATGTCCCACTCTCTCGTCTT
SiVQ06-F	CACGGTTGGAGCGTATGG
SiVQ06-R	CTCTCGTACATGACGTTC
SiVQ07-F	CTACGTGGAGTCACCCAAAG
SiVQ07-R	CATAGCGGATGACGCTGAA
SiVQ08-F	GCGATCCAGTTGAAGGTGAA
SiVQ08-R	GCTGAAGAGGAAATCCTCCAG
SiVQ10-F	GAGGATGAGAAGGCCAAGC
SiVQ10-R	GCTCTGAGCATCTTGCGAT
SiVQ11-F	CCGTCGTCAGCACAGAATAA
SiVQ11-R	CGCGATCATCTTGAGGTTGT
SiVQ12-F	GCGTCGAGCCACGGGAGTT
SiVQ12-R	GAACGAGAACCACGGCGAG
SiVQ13-F	ATCGAGACGCGGTTCATC
SiVQ13-R	GCACGGTCATCAGAGCTT
SiVQ14-F	AGGTGAAGGTGGAGGAAGGAG
SiVQ14-R	ACCGAGAGGCAGAAGGAAGTC
SiVQ15-F	CCGAGGCGACAAGAAGAG
SiVQ15-R	CTGAGGTCGTGGAACATGAG
SiVQ16-F	TATGTGCCAGCCGAAATCC
SiVQ16-R	GTGGTAGCTTTCCCACCTTC
SiVQ17-F	CTCCTTCAAGCAGGTGGTC
SiVQ17-R	ACAGCATCTTGAGGCTCTTC
SiVQ18-F	CCAGCTTCAAGTCGGTCGTG
SiVQ18-R	GAGTGGTGGTGATCGGCAAA
SiVQ19-F	CGAACAGCCAGCCAAGAA
SiVQ19-R	CCGCTCGTACAGCTTGAAA
SiVQ20-F	AAGGGCGGGGGCAAGAAG
SiVQ20-R	GGGCTGGCAACAACGGTG
SiVQ22-F	TTCTCGGGATGCAAGATCAC
SiVQ22-R	CGGTGGTCGAACAAGGG
SiVQ23-F	CGTCAAGCCCAGCGAGTTCAT
SiVQ23-R	GCCTGATGGTGGTGGTGGTAGT
SiVQ24-F	GGCGTCGTTCTACTACTACCA
SiVQ24-R	CTCCTTGCTTATCACCACCAC
SiVQ25-F	TCCTTGCCGATGACAACAAT
SiVQ25-R	GGTTGGCGGCGATGTAG
SiVQ26-F	CATGACCGTGACCATGGATT
SiVQ26-R	TCTTGGTGGAGCTGGATTTG
SiVQ27-F	GTGGAGCCCAGGGACTT
SiVQ27-R	CGAGTACCACGACGCGTAA
SiVQ28-F	AGTTCAGGTGCTGCTTGT
SiVQ28-R	CTAGTAGTCGTCGGCGTTG
SiVQ31-F	GCTGCTGATCATCACTACCAT
SiVQ31-R	GGCGAAGGAGGAGAAGAAAC
SiVQ32-F	TCCTCGTCCTACTCGTCGTT
SiVQ32-R	GTTTGATCGTACATGCCCTG
Actin-F	CCTATGTGGCACTTGACTATG
Actin-R	GCGACTCCATACCAATGAAT
Actin gene (SETIT_010361mg) was used as internal control for this experiment

## Sheet: Table S2
Table S2. Detailed information on the VQ genes in Arabidopsis and rice.
Specics	Gene_ID	Gene_name	Protein_name	Chromosome_position	VQ-Interacting WRKY Protein	Family group
Arabidopsis	AT1G17147	AtVQ1		1: 5,863,109-5,864,059	WRKY33(I)	I
	AT1G78410	AtVQ10		1:29502506..29503938	WRKY25(I)/26(I)/33(I)	I
	AT1G21320	AtVQ2		1:7462327..7466164	WRKY25(I)/26(I)/51(IIc)	II
	AT1G21326	AtVQ3		1:7468765..7469995	WRKY25(I)/33(I)	II
	AT1G68450	AtVQ8	PIGMENT DEFECTIVE 337 (PDE337)	1:25661487..25662276	WRKY20(I)/24(IIc)/34(I)	II
	AT2G22880	AtVQ12		2:9741119..9741463	WRKY20(I)/23(I)/24(IIc)/45(I)/56(IIc)	II
	AT3G18360	AtVQ20		3:6300620..6301812	WRKY20(I)/WRKY75(IIc)	II
	AT3G18690	AtVQ21	MAP kinase substrate 1 (MKS1)	3:6429534..6430517	WRKY25(I)/33(I)	II
	AT4G37710	AtVQ29		4:17718118..17718771	WRKY25(I)/33(I)/43(IIc)/56(IIc)	II
	AT2G41180	AtVQ16	Sigma factor binding protein 2 (SIB2)	2:17165191..17166110	WRKY33(I)	III
	AT2G42140	AtVQ17		2:17568677..17569669	WRKY33(I)	III
	AT2G44340	AtVQ18		2:18314188..18315322	WRKY25(I)/33(I)/51(IIc)	III
	AT3G56710	AtVQ23	Sigma factor binding protein1 (SIB1)	3:21006638..21008068	WRK20(I)/33(I)	III
	AT3G58000	AtVQ25		3:21474870..21475750	WRKY25(I)/33(I)	III
	AT3G60090	AtVQ26		3:22190782..22191748	WRKY25(I)/33(I)/51(IIc)	III
	AT1G28280	AtVQ4	MPK3/6-targeted VQP 1 (MVQ1)	1:9885400..9887478	WRKY25(I)/33(I)	IV
	AT1G80450	AtVQ11		1:30243430..30244949	WRKY25(I)/33(I)	IV
	AT2G33780	AtVQ13	MPK3/6-targeted VQP 2 (MVQ2)	2:14290969..14291806	WRKY25(I)/33(I)	IV
	AT3G15300	AtVQ19	MPK3/6-targeted VQP 4 (MVQ4)	3:5147244..5148340	WRKY25(I)/33(I)	IV
	AT5G08480	AtVQ31		5:2743319..2745111	WRKY24(IIc)/33(I)/43(IIc)/51(IIc)/56(IIc)	IV
	AT5G53830	AtVQ33	MPK3/6-targeted VQP 3 (MVQ3)	5:21856948..21858102	WRKY25(I)/33(I)	IV
	AT1G35830	AtVQ7		1:13320675..13322511	WRKY25(I)/33(I)/51(IIc)	V
	AT3G22160	AtVQ22	jasmonate-associated VQ motif gene 1 (JAV1)	3:7817779..7818985	WRKY51(IIc)	V
	AT4G15120	AtVQ27		4:8634508..8635591	WRKY51(IIc)	V
	AT4G20000	AtVQ28		4:10838310..10839335	WRKY25(I)/33(I)/51(IIc)	V
	AT4G39720	AtVQ30		4:18428809..18431136	WRKY25(I)/33(I)/51(IIc)	V
	AT5G65170	AtVQ34		5:26041045..26043267		V
	AT2G41010	AtVQ15	Calmodulin (CAM)-binding protein of 25 kDa (CAMBP25)	2:17113798..17115047	WRKY25(I)/33(I)/51(IIc)	VI
	AT3G56880	AtVQ24		3:21059785..21061247	WRKY20(I)/75(IIc)	VI
	AT1G32585	AtVQ5		1:11788515..11789177	WRKY25(I)/33(I)/51(IIc)	VII
	AT1G32610	AtVQ6		1: 11795609..11797221		VII
	AT1G78310	AtVQ9		1:29463548..29465249	WRKY8(IIc)/20(I)	VII
	AT2G35230	AtVQ14	IKU1/MVQ9	2:14842291..14844465		VII
	AT5G46780	AtVQ32		5:18978953..18980183	WRKY20(I)	VII
rice	LOC_Os01g46440	OsVQ2		1:26423509..26423740		I
	LOC_Os02g15280	OsVQ6		2:8539272..8539740		I
	LOC_Os02g15290	OsVQ7		2:8541337..8542125		I
	LOC_Os05g12090	OsVQ18		5:6919767..6920052		I
	LOC_Os06g33970	OsVQ22		6:19780910..19781815		I
	LOC_Os02g33600	OsVQ8		2:20000993..20001821		II
	LOC_Os03g47280	OsVQ13		3:26752011..26752699		II
	LOC_Os03g57520	OsVQ14		3:32798002..32798506		II
	LOC_Os04g34050	OsVQ15		4:20624597..20625919		II
	LOC_Os06g40090	OsVQ23		6:23863460..23864522		II
	LOC_Os07g06750	OsVQ26		7:3296839..3297367		II
	LOC_Os07g06760	OsVQ27		7:3301501..3302065		II
	LOC_Os07g06790	OsVQ28		7:3313463..3313997		II
	LOC_Os08g01260	OsVQ32		8:167959..168583		II
	LOC_Os01g59410	OsVQ4		1:34356639..34357450		III
	LOC_Os03g20330	OsVQ10		3:11497785..11498677		III
	LOC_Os04g57030	OsVQ17		4:33990085..33990541		III
	LOC_Os05g32460	OsVQ19		5:18958613..18960147		III
	LOC_Os05g41250	OsVQ20		5:24171333..24171900		III
	LOC_Os06g41450	OsVQ24		6:24843678..24844760		III
	LOC_Os07g48800	OsVQ31		7:29206932..29207571		III
	LOC_Os01g54400	OsVQ3		1:31298866..31300184		IV
	LOC_Os04g55240	OsVQ16		4:32852141..32853428		IV
	LOC_Os05g44270	OsVQ21		5:25760308..25761442		IV
	LOC_Os02g07690	OsVQ5		2:4008990..4010136		V
	LOC_Os03g26990	OsVQ12		3:15436384..15437786		V
	LOC_Os06g45570	OsVQ25		6:27594624..27595564		V
	LOC_Os07g43140	OsVQ29		7:25847725..25848484		V
	LOC_Os08g31660	OsVQ33		8:19610443..19612183		V
	LOC_Os09g20460	OsVQ35		9:12319371..12321209		V
	LOC_Os01g17050	OsVQ1		1:9770014..9771037		VI
	LOC_Os03g20440	OsVQ11		3:11568382..11569520		VI
	LOC_Os07g48710	OsVQ30		7:29171071..29172231		VI
	LOC_Os11g03660	OsVQ37		11:1425881..1426610		VI
	LOC_Os12g03420	OsVQ39		12:1332835..1333568		VI
	LOC_Os10g01240	OsVQ36		10:159716..160240		VII

## Sheet: Table S3
Table S3. Common orthologous gene pairs of VQ genes between millet and other species.
Foxtail millet	Maize	Sorghum	Rice	Arabidopsis
SiVQ02	Zm00001d053415	OQU84716	OsVQ7		Os02t0251900-01
SiVQ03	Zm00001d016748		OsVQ8		Os02t0539500-01
SiVQ04	Zm00001d018845	KXG34439	OsVQ26		Os07t0161700-00
SiVQ05	Zm00001d022191	OQU90293		AtVQ30
SiVQ06	Zm00001d007199	OQU90528	OsVQ30		Os07t0686600-01
SiVQ07	Zm00001d026673	OQU82618
SiVQ08	Zm00001d001931	EES13045	OsVQ17		Os04t0665900-00
SiVQ10	Zm00001d039082,Zm00001d009637	OQU78467
SiVQ11	Zm00001d038810	EES18519	OsVQ21		Os05t0519000-00
SiVQ12	Zm00001d031189	OQU79728
SiVQ13	Zm00001d046132	EER88443	OsVQ22		Os06t0530600-00
SiVQ14	Zm00001d036792, Zm00001d046728	EER90053	OsVQ24		Os06t0618700-01
SiVQ15	Zm00001d036893, Zm00001d046496	EER90015	OsVQ23		Os06t0603300-00
SiVQ16	Zm00001d036650, Zm00001d046961	OQU76839	OsVQ5, OsVQ25		Os02t0173200-01,Os06t0666400-01
SiVQ17	Zm00001d039428, Zm00001d008878	EES00109
SiVQ18	Zm00001d044027	KXG33008	OsVQ2		Os01t0653300-00
SiVQ19	Zm00001d043450	EES03601	OsVQ3		Os01t0747800-01
SiVQ20	Zm00001d012551	EES01627	OsVQ4		Os01t0808900-00
SiVQ21	Zm00001d034979	EES13183	OsVQ32		Os08t0102900-00
SiVQ22	Zm00001d050294	OQU80413	OsVQ33		Os08t0409500-01
SiVQ23	Zm00001d025374, Zm00001d003743	OQU81546	OsVQ15		Os04t0417600-00
SiVQ24	Zm00001d026440, Zm00001d002088	OQU82436	OsVQ16		Os04t0645200-01
SiVQ25	Zm00001d023269, Zm00001d005007	OQU82792, KXG22865	OsVQ37, OsVQ39		Os11t0131100-00,Os12t0127800-01
SiVQ26	Zm00001d034379, Zm00001d013104	EER93327
SiVQ27	Zm00001d033389, Zm00001d013550	EER91085	OsVQ13		Os03t0676400-01
SiVQ28	Zm00001d030180	OQU92040
SiVQ29	Zm00001d030177
SiVQ30	Zm00001d030024	OQU92074
SiVQ31	Zm00001d047202	OQU92495	OsVQ12	AtVQ30	Os03t0387300-01
SiVQ32	Zm00001d028941, Zm00001d047591	EER94949

## Sheet: Table S4
Table S4. Evolutionary analysis of VQ genes between millet and the other three monocots.
Species	Locus 1	Locus 2	Ka	Ks	Ka/Ks	T(MYA)
Foxtail millet & Maize	SiVQ02	Zm00001d053415	0.51259	0.664424	0.77148	51.1095
	SiVQ03	Zm00001d016748	0.0591337	0.405442	0.14585	31.1878
	SiVQ04	Zm00001d018845	0.347352	0.301862	1.1507	23.2202
	SiVQ05	Zm00001d022191	0.116693	0.430584	0.271011	33.1218
	SiVQ06	Zm00001d007199	0.36991	0.42157	0.877458	32.4285
	SiVQ07	Zm00001d026673	0.68252	0.407685	1.67414	31.3604
	SiVQ08	Zm00001d001931	0.203544	0.911831	0.223226	70.1408
	SiVQ10	Zm00001d039082	0.357347	0.697831	0.512083	53.6793
	SiVQ10	Zm00001d009637	0.368856	0.900009	0.409837	69.2315
	SiVQ11	Zm00001d038810	0.0556694	0.405321	0.137346	31.1785
	SiVQ12	Zm00001d031189	0.385154	0.799374	0.48182	61.4903
	SiVQ13	Zm00001d046132	0.106559	0.92465	0.115242	71.1269
	SiVQ14	Zm00001d036792	0.211342	0.455045	0.464442	35.0035
	SiVQ14	Zm00001d046728	0.159809	0.764203	0.209118	58.7848
	SiVQ15	Zm00001d036893	0.062729	0.710657	0.088269	54.6659
	SiVQ15	Zm00001d046496	0.167765	0.108507	1.54612	8.34669
	SiVQ16	Zm00001d036650	0.213776	0.79212	0.269878	60.9323
	SiVQ16	Zm00001d046961	0.16456	0.691436	0.237998	53.1874
	SiVQ17	Zm00001d039428	0.0371794	0.349133	0.106491	26.8564
	SiVQ17	Zm00001d008878	0.062717	0.610747	0.102689	46.9805
	SiVQ18	Zm00001d044027	0.185084	0.454998	0.40678	34.9998
	SiVQ19	Zm00001d043450	0.0653967	0.575578	0.113619	44.2752
	SiVQ20	Zm00001d012551	0.0837298	0.622542	0.134497	47.8878
	SiVQ21	Zm00001d034979	0.366448	0.25723	1.42459	19.7869
	SiVQ22	Zm00001d050294	0.279127	0.796209	0.350569	61.2468
	SiVQ23	Zm00001d025374	0.0989561	0.456532	0.216756	35.1178
	SiVQ23	Zm00001d003743	0.102402	0.356827	0.28698	27.4482
	SiVQ24	Zm00001d026440	0.0964709	0.617996	0.156103	47.5382
	SiVQ24	Zm00001d002088	0.178802	0.495864	0.360587	38.1434
	SiVQ25	Zm00001d023269	0.359757	1.13273	0.3176	87.1331
	SiVQ25	Zm00001d005007	0.413939	1.35403	0.305708	104.156
	SiVQ26	Zm00001d034379	0.148159	0.419235	0.353402	32.2488
	SiVQ26	Zm00001d013104	0.128846	0.228772	0.563205	17.5978
	SiVQ27	Zm00001d033389	0.420847	0.212649	1.97907	16.3576
	SiVQ27	Zm00001d013550	0.38183	0.6878	0.555146	52.9077
	SiVQ28	Zm00001d030180	0.373964	1.03412	0.361625	79.5477
	SiVQ29	Zm00001d030177	0.245538	0.642652	0.38207	49.4348
	SiVQ30	Zm00001d030024	0.127945	0.59543	0.214878	45.8023
	SiVQ31	Zm00001d047202	0.11074	0.355557	0.311455	27.3505
	SiVQ32	Zm00001d028941	0.109509	0.562784	0.194585	43.2911
	SiVQ32	Zm00001d047591	0.201899	1.10609	0.182534	85.0838
Foxtail millet & Sorghum	SiVQ02	OQU84716	0.512743	0.821444	0.624196	63.188
	SiVQ04	KXG34439	0.198083	0.868864	0.227979	66.8357
	SiVQ05	OQU90293	0.0791608	0.37481	0.211202	28.8315
	SiVQ06	OQU90528	0.301198	1.06654	0.282406	82.0415
	SiVQ07	OQU82618	0.629839	0.906604	0.694723	69.7388
	SiVQ08	EES13045	0.162863	0.381599	0.42679	29.3538
	SiVQ10	OQU78467	0.180577	0.283593	0.636744	21.8148
	SiVQ11	EES18519	0.042208	0.414824	0.101749	31.9095
	SiVQ12	OQU79728	0.429485	0.659115	0.651609	50.7012
	SiVQ13	EER88443	0.100925	0.510651	0.19764	39.2808
	SiVQ14	EER90053	0.180251	0.597754	0.301547	45.9811
	SiVQ15	EER90015	0.051095	0.567623	0.0900157	43.6633
	SiVQ16	OQU76839	0.233127	1.18509	0.196716	91.1608
	SiVQ17	EES00109	0.0273584	0.583752	0.0468666	44.904
	SiVQ18	KXG33008	0.16362	0.419265	0.390255	32.2512
	SiVQ19	EES03601	0.0209806	0.916985	0.02288	70.5373
	SiVQ20	EES01627	0.0653122	0.545463	0.119737	41.9587
	SiVQ21	EES13183	0.246566	0.694104	0.35523	53.3926
	SiVQ22	OQU80413	0.255251	0.257737	0.990358	19.8259
	SiVQ23	OQU81546	0.13397	0.869907	0.154005	66.9159
	SiVQ24	OQU82436	0.0806262	0.809068	0.0996532	62.236
	SiVQ25	OQU82792	0.306975	0.783204	0.391948	60.2465
	SiVQ25	KXG22865	0.288268	1.47299	0.195703	113.307
	SiVQ26	EER93327	0.114316	0.465317	0.245672	35.7936
	SiVQ27	EER91085	0.371092	0.234061	1.58545	18.0047
	SiVQ28	OQU92040	0.353915	0.367296	0.963568	28.2535
	SiVQ30	OQU92074	0.0647574	0.467979	0.138377	35.9984
	SiVQ31	OQU92495	0.0994136	0.391619	0.253853	30.1245
	SiVQ32	EER94949	0.0860721	0.831032	0.103573	63.9255
Foxtail millet & Rice	SiVQ02	OsVQ7	0.496419	1.8409	0.269662	141.608
	SiVQ03	OsVQ8	0.224911	1.06121	0.211939	81.6315
	SiVQ04	OsVQ26	0.576733	0.469104	1.22943	36.0849
	SiVQ06	OsVQ30	0.265981	0.584356	0.45517	44.9505
	SiVQ08	OsVQ17	0.238414	0.843692	0.282584	64.8994
	SiVQ11	OsVQ21	0.107098	0.651167	0.164471	50.0898
	SiVQ13	OsVQ22	0.379993	0.627308	0.605753	48.2545
	SiVQ14	OsVQ24	0.374417	0.36074	1.03791	27.7492
	SiVQ15	OsVQ23	0.0939639	0.781637	0.120214	60.1259
	SiVQ16	OsVQ5	0.333423	1.82758	0.182439	140.583
	SiVQ16	OsVQ25	0.245978	0.977903	0.251536	75.2233
	SiVQ18	OsVQ2	0.415347	0.62008	0.669827	47.6985
	SiVQ19	OsVQ3	0.0585754	1.01823	0.0575269	78.3254
	SiVQ20	OsVQ4	0.401216	0.657087	0.610598	50.5452
	SiVQ21	OsVQ32	0.539664	0.948384	0.569035	72.9526
	SiVQ22	OsVQ33	0.409567	0.465288	0.880244	35.7914
	SiVQ23	OsVQ15	0.252673	1.30081	0.194243	100.062
	SiVQ24	OsVQ16	0.14819	0.890347	0.166441	68.4882
	SiVQ25	OsVQ37	0.418225	0.6722	0.622173	51.7077
	SiVQ25	OsVQ39	0.442958	0.699975	0.632819	53.8442
	SiVQ27	OsVQ13	0.399501	0.954685	0.418463	73.4373
	SiVQ31	OsVQ12	0.352955	0.281338	1.25456	21.6414
Ka: non-synonymous rate, Ks: synonymous rate, T: divergent time ( T=Ks/ (2×6.5×10^-9)×10^-6 million years ago (MYA)).

## Sheet: Table S5
Table S5. List of cis-acting elements of the SiVQ gene family members.
Category	Cis-acting element	cladeⅠ						clade Ⅳ				clad Ⅶ		cladeⅥ		cladeⅤ				cladeⅢ				cladeⅡ										Sequence	Function
		SiVQ01	SiVQ02	SiVQ13	SiVQ10	SiVQ09	SiVQ18	SiVQ24	SiVQ17	SiVQ11	SiVQ19	SiVQ28	SiVQ29	SiVQ25	SiVQ06	SiVQ22	SiVQ16	SiVQ05	SiVQ31	SiVQ20	SiVQ32	SiVQ08	SiVQ14	SiVQ12	SiVQ27	SiVQ30	SiVQ15	SiVQ03	SiVQ23	SiVQ04	SiVQ26	SiVQ07	SiVQ21
Abiotic and biotic stresses	ARE	2	1	0	0	1	0	0	1	1	3	1	0	2	1	2	0	0	0	1	1	3	3	2	1	2	2	0	2	2	1	4	4	AAACCA	cis-acting regulatory element essential for the anaerobic induction
	box S	0	0	0	0	0	1	0	1	0	0	0	0	0	0	0	1	1	0	0	0	0	0	0	0	0	0	0	0	0	1	0	0	AGCCACC	Biotic/Wound
	CCAAT-box	2	1	1	0	0	2	1	0	1	2	1	0	0	1	0	0	0	0	0	1	2	1	0	3	0	0	0	1	0	3	1	1	CAACGG	MYBHv1 binding site
	CCGTCC motif	0	0	0	0	0	2	2	1	1	2	0	0	2	1	0	1	1	2	0	1	0	0	2	6	0	2	1	4	0	3	0	0	CCGTCC	drought and high-salinity stress responsive genes
	DRE core	1	1	1	0	0	1	3	0	1	0	0	0	0	2	3	1	0	1	0	1	1	1	1	1	0	2	0	2	1	1	0	0	GCCGAC	drought and high-salinity stress responsive genes
	E-box	0	0	0	0	0	0	0	0	0	0	0	0	0	0	0	0	0	0	0	0	0	0	0	0	0	0	0	0	0	0	0	1	ACCCATCAAG	cis-acting element involved in defense and stress responsiveness
	GCC-box	0	0	1	0	0	0	0	0	0	0	1	1	0	0	0	1	1	1	0	0	0	0	1	0	0	0	0	0	0	0	0	0	AGCCGCC	cis-acting element involved in pathogenic damage
	GC-motif	0	0	1	0	0	1	2	1	0	2	1	0	2	0	1	1	0	1	4	0	0	1	2	1	0	6	0	2	0	1	1	1	CCCCCG	anoxic
	GT-1	3	9	7	3	3	6	1	7	3	4	1	5	3	0	4	4	1	2	4	1	1	3	4	4	1	5	1	10	2	3	6	4	GAAAAA	cis-acting element involved in salt stress
	H-box	2	2	1	0	0	1	0	0	0	0	1	0	1	1	1	1	1	1	0	1	0	1	1	1	0	0	1	1	1	3	1	0	CCTACC	cis-acting element involved in defense and stress responsiveness
	HSE	0	0	0	0	1	0	0	0	0	1	1	0	0	0	0	0	0	0	0	1	0	0	0	0	0	0	0	0	0	0	0	0	ATAAATGT	cis-acting element involved in heat stress
	JERE	0	0	0	0	0	0	0	0	0	0	0	0	0	0	0	0	0	0	0	0	0	1	0	0	0	0	0	0	0	0	0	0	AGACCGCC	Biotic/Wound
	LTR	1	0	0	0	0	1	1	2	1	0	1	0	1	1	2	0	1	1	0	1	0	1	2	0	1	0	3	1	1	0	1	1	CCGAAA	cis-acting element involved in low temperature responsiveness
	MBS	1	0	0	1	0	1	1	1	2	0	1	1	1	3	2	0	0	0	2	1	3	1	1	0	0	0	0	1	0	1	2	1	CAACTG	MYB binding site involved in drought inducibility
	MBSI	0	0	1	0	0	0	0	0	0	0	0	0	0	0	0	0	0	0	0	0	0	0	0	0	0	0	0	0	0	0	0	1	aaaAaaC(G/C)GTTA	MYB binding site involved in flavonoid biosynthetic genes regulation
	MYB	9	3	4	5	1	9	2	4	3	2	4	4	2	8	6	1	6	5	6	4	7	5	2	2	6	2	2	1	5	7	6	7	CAACCA	MYB binding site involved in drought inducibility
	Myb-binding site	1	0	0	1	0	5	0	1	0	0	1	0	1	1	0	0	0	1	0	1	1	1	0	1	1	1	1	0	1	3	1	1	CAACAG	MYB binding site involved in drought inducibility
	MYB-like sequence	0	1	1	2	0	1	0	2	0	0	0	0	0	2	4	1	2	2	3	0	0	0	0	0	0	0	1	0	2	1	0	1	TAACCA	MYB binding site involved in drought inducibility
	MYB recognition site	2	1	1	0	0	2	1	0	1	2	1	0	0	1	0	0	0	0	0	1	2	1	0	3	0	0	0	1	0	3	1	1	CCGTTG	MYB binding site involved in drought inducibility
	MYC	3	4	3	2	5	2	2	2	1	4	0	4	4	2	4	4	1	2	6	5	4	3	1	3	4	8	4	4	3	5	1	1	CATGTG	MYC binding site
	NRE	0	0	0	0	0	0	0	0	0	0	0	0	0	0	0	0	0	0	0	0	0	1	0	0	0	0	0	0	0	0	1	0	GACC(T)CTTN10AAG	cis-acting element involved in nitrate responsiveness
	STRE	2	2	3	3	4	3	6	2	10	3	8	4	3	4	2	9	4	5	4	2	1	1	2	4	5	1	5	6	3	3	2	4	AGGGG	heat shock protein-related element
	TC-rich repeats	1	0	0	0	0	0	0	1	0	0	0	1	0	0	2	0	0	1	2	0	0	0	0	0	0	3	0	0	1	0	1	0	GTTTTCTTAC	cis-acting element involved in defense and stress responsiveness
	W box	0	0	4	1	1	0	0	3	2	1	0	1	3	1	0	0	0	1	0	2	2	0	2	1	2	4	0	0	3	2	2	4	TTGACC	Fungal elicitor responsive element, wound responsive
	WUN-motif	1	0	0	4	1	0	0	0	0	0	0	0	1	0	0	0	0	0	0	2	0	1	3	0	0	0	2	0	0	0	0	0	CCATTTCAA	Wound-responsive element
Phytohormone responsive	ABRE	11	4	1	4	1	5	8	7	2	1	4	1	5	0	1	5	1	5	0	8	6	4	11	9	4	7	0	6	7	0	5	2	ACGTG	cis-acting element involved in the abscisic acid responsiveness
	ABRE2	0	0	0	0	0	0	0	0	0	0	0	0	0	0	0	0	0	0	0	0	1	0	0	0	0	1	0	1	0	0	0	0	CCACGTGG	cis-acting element involved in the abscisic acid responsiveness
	ABRE3a	2	0	0	0	0	1	3	3	0	0	0	0	1	0	0	0	0	2	0	2	1	3	2	1	0	1	0	0	2	0	3	1	TACGTG	cis-acting element involved in the abscisic acid responsiveness
	ABRE4	2	0	0	0	0	1	3	3	0	0	0	0	1	0	0	0	0	2	0	2	1	3	2	1	0	1	0	0	2	0	3	1	CACGTA	cis-acting element involved in the abscisic acid responsiveness
	as-1	8	2	2	5	1	3	5	1	4	2	8	6	5	4	1	4	1	2	0	3	2	1	1	3	2	1	1	1	4	5	4	3	TGACG	SA and oxidative responsiveness
	AuxRR-core	0	0	0	0	0	2	0	0	0	0	0	0	0	1	1	0	0	0	0	0	1	1	0	2	0	0	0	1	0	0	1	0	GGTCCAT	cis-acting regulatory element involved in auxin responsiveness
	CARE	0	0	0	0	0	0	0	0	0	0	0	0	0	0	0	0	0	0	0	0	0	1	1	0	0	0	0	0	0	0	0	0	CAACTCCC	GA-responsiveness in seeds
	CATATGGMSAUR	1	2	1	0	1	0	0	0	0	0	0	2	1	2	2	2	0	1	0	0	0	0	0	1	0	1	0	0	1	1	2	0	CATATG	cis-acting regulatory element involved in auxin responsiveness
	CGTCA-motif	8	2	2	5	1	3	5	1	4	2	8	6	5	4	1	4	1	2	0	3	2	1	1	3	2	1	1	1	4	5	4	3	CGTCA	cis-acting regulatory element involved in the MeJA-responsiveness
	ERE	0	0	0	0	0	0	1	1	0	2	0	0	0	0	0	0	1	1	1	1	0	0	0	1	0	1	0	1	0	0	0	0	ATTTTAAA	ethylene response element
	GARE-motif	0	0	0	0	0	3	0	1	0	0	0	0	0	0	0	0	0	0	0	0	1	0	0	0	0	0	0	0	0	1	0	0	TCTGTTG	gibberellin-responsive element
	P-box	1	0	1	1	1	0	0	0	1	0	0	0	0	0	1	0	0	1	2	0	1	0	0	0	0	1	0	1	1	3	0	0	CCTTTTG	gibberellin-responsive element
	PYRIMIDINEBOXHVEPB1	1	0	1	0	0	0	0	1	0	0	1	1	1	0	1	1	0	0	0	0	0	0	1	0	0	0	0	0	1	1	0	0	TTTTTTCC	gibberellin-responsive element
	TATC-box	0	0	1	0	0	0	0	0	0	0	1	0	0	0	0	1	0	0	0	0	0	0	0	1	0	0	0	0	0	0	0	0	TATCCCA	cis-acting element involved in gibberellin-responsiveness
	TCA-element	0	0	0	0	1	1	0	3	1	0	0	0	0	0	0	1	0	0	0	0	1	0	1	0	0	0	0	0	0	0	1	0	CCATCTTTTT	cis-acting element involved in salicylic acid responsiveness
	TGACG-motif	8	2	2	5	1	3	5	1	4	2	8	6	5	4	1	4	1	2	0	3	2	1	1	3	2	1	1	1	4	5	4	3	TGACG	cis-acting regulatory element involved in the MeJA-responsiveness
	TGA-element	1	0	0	0	0	0	2	4	1	1	0	5	1	0	1	0	3	0	0	0	0	1	0	0	0	0	1	1	1	0	0	0	AACGAC	Auxin-responsive element
Plant growth and development	AC-I	0	0	1	0	0	0	0	0	0	0	2	0	0	0	0	2	0	0	0	0	0	0	1	0	0	0	0	0	0	0	0	0	(T/C)C(T/C)(C/T)ACC(T/C)ACC	Development
	AT-rich sequence	0	0	0	0	0	0	0	0	0	0	0	0	0	0	0	0	0	0	0	0	0	0	0	0	0	0	0	1	1	0	0	0	TAAAATACT	Regulatory
	Box II -like sequence	0	0	0	0	0	0	0	0	0	0	0	0	0	0	0	0	0	0	0	0	0	0	0	0	0	0	0	0	0	1	0	0	TCCGTGTACCA	cis-acting regulatory element
	CAAT-box	23	18	25	35	33	18	6	27	11	37	12	35	21	11	25	16	24	29	30	28	45	24	22	19	23	36	28	17	26	23	28	27	CAAT/CAAAT	Regulatory
	CAT-box	0	0	1	0	1	1	1	0	1	1	2	2	1	0	0	3	1	0	2	0	0	0	1	0	0	1	0	0	1	1	1	0	GCCACT	cis-acting regulatory element related to meristem expression
	CCGTCC-box	0	0	0	0	0	2	2	1	1	2	0	0	2	1	0	1	1	2	0	1	0	0	2	6	0	2	1	4	0	3	0	0	CCGTCC	Meristm
	dOCT	0	0	0	0	0	0	0	0	0	0	0	0	1	0	2	0	0	0	0	1	1	0	0	0	0	0	0	1	0	0	1	0	CACGGATC	Meristm
	E2Fb	0	0	0	0	1	0	0	0	0	0	0	0	0	0	0	0	0	0	0	0	0	0	0	0	0	0	0	0	0	0	0	0	TTTGCCGC	E2F-binding site; G1-M transition of cell cycle
	GCN4_motif	1	0	1	0	0	0	1	0	0	0	0	0	0	0	0	0	0	0	0	0	0	1	1	0	1	0	0	0	0	0	0	0	TGAGTCA	cis-regulatory element involved in endosperm expression
	MSA-like	0	0	0	0	0	0	0	0	0	0	0	0	0	0	0	0	0	0	0	0	1	0	0	1	1	0	0	0	0	0	0	0	TCCAACGGT	cis-acting element involved in cell cycle regulation
	NON-box	0	0	0	0	0	0	0	0	1	0	0	0	0	0	0	0	0	0	0	1	0	0	0	0	0	0	0	0	0	0	0	0	AGATCGACG	cis-acting regulatory element related to meristem specific activation
	O2-site	1	0	0	0	1	0	0	1	0	1	2	0	1	0	0	1	0	0	1	2	0	2	1	1	0	0	1	1	1	0	0	1	GATGATGTGG	cis-acting regulatory element involved in zein metabolism regulation
	RY-element	1	0	0	0	0	0	1	0	0	0	0	0	1	1	1	0	0	0	0	0	0	0	1	0	0	0	1	0	2	0	0	0	CATGCATG	cis-acting regulatory element involved in seed-specific regulation
Light responsive	3-AF1 binding site	0	0	0	0	0	0	0	0	0	1	0	0	0	0	0	0	0	0	0	0	0	0	0	0	0	0	0	0	0	0	0	0	TAAGAGAGGAA	light responsive element
	A-box	0	0	0	0	0	2	2	1	1	2	0	0	2	1	0	1	1	2	0	1	0	0	2	6	0	2	1	4	0	3	0	0	CCGTCC	Elicitor or Light responsive
	AAAC-motif	0	0	0	0	0	0	0	0	0	0	0	0	0	0	0	0	0	1	0	0	0	0	0	0	0	0	0	0	0	0	0	0	CAATCAAAACCT	light responsive element
	ACE	1	0	0	1	1	0	0	0	0	0	0	0	1	0	0	0	0	0	0	1	1	0	0	1	0	0	0	0	0	1	0	0	GACACGTATG	cis-acting element involved in light responsiveness
	AE-box	0	1	0	0	0	0	0	0	0	0	0	0	0	0	0	0	0	0	0	0	1	0	0	0	1	0	0	0	0	1	1	0	AGAAACAA	part of a module for light response
	AT1-motif	0	1	0	0	0	0	0	0	0	0	0	0	0	0	0	0	0	0	0	0	0	0	0	0	0	0	0	0	0	0	0	0	AATTATTTTTTATT	part of a light responsive module
	ATC-motif	0	0	2	0	0	0	0	0	0	0	0	0	0	1	0	0	0	0	1	1	0	0	0	0	0	0	1	0	0	0	0	0	TGCTATCCG	part of a conserved DNA module involved in light responsiveness
	ATCT-motif	0	0	0	1	0	0	0	0	0	1	0	1	0	0	0	1	0	1	0	1	0	0	0	0	0	0	0	0	0	0	0	0	AATCTAATCC	part of a conserved DNA module involved in light responsiveness
	Box 4	0	2	2	1	0	1	1	0	1	0	0	0	1	1	0	0	0	1	2	1	4	4	0	1	5	1	2	1	1	0	1	1	ATTAAT	part of a conserved DNA module involved in light responsiveness
	Box II	0	0	0	0	0	0	0	0	0	0	0	0	0	0	0	0	0	0	0	0	0	0	0	0	0	1	0	0	0	0	0	1	CCACGTGGC	part of a light responsive element
	chs-CMA1a	0	0	0	0	0	0	0	0	0	0	0	0	0	0	0	0	0	0	0	0	1	0	0	0	0	0	0	0	0	0	0	0	TTACTTAA	part of a light responsive element
	chs-CMA2a	0	0	0	0	0	0	0	0	0	0	0	0	0	0	0	0	0	0	0	0	0	0	0	0	0	0	0	0	0	0	1	0	TCACTTGA	part of a light responsive element
	circadian	0	0	0	0	0	0	0	0	0	1	0	1	0	0	0	0	0	0	0	0	0	0	0	0	0	1	0	0	0	0	0	0	CAAAGATATC	cis-acting regulatory element involved in circadian control
	EEs	0	0	0	0	0	0	0	0	0	0	0	0	0	0	0	0	0	0	0	0	0	0	0	0	0	1	0	0	0	0	0	0	AAAATATCT	cis-acting regulatory element involved in circadian control
	G-box	12	2	1	4	1	5	5	7	0	1	4	1	5	0	2	4	2	4	2	7	7	5	11	7	3	7	0	8	4	0	5	3	CACGTT/CACGAC	cis-acting regulatory element involved in light responsiveness
	GA-motif	0	0	0	0	0	0	0	0	0	0	0	0	0	0	0	0	0	0	0	1	1	1	0	0	0	0	0	0	0	0	1	0	ATAGATAA	part of a light responsive element
	Gap-box	0	0	1	0	0	0	0	0	0	0	0	1	1	0	0	0	0	0	0	0	0	0	0	0	0	0	0	0	0	0	0	0	CAAATGAA(A/G)A	part of a light responsive element
	GATA-motif	0	1	0	0	3	2	1	0	0	0	2	0	1	0	1	0	0	2	1	0	1	1	1	1	1	0	1	0	0	1	0	0	GATAGGG	part of a light responsive element
	GT1-motif	1	0	2	2	1	1	0	1	0	0	1	0	2	1	0	1	2	1	5	3	0	0	0	0	0	1	0	1	2	0	0	5	GGTTAAT	light responsive element
	GTGGC-motif	0	1	0	0	0	0	1	0	2	0	0	0	1	0	0	0	0	0	0	0	0	0	0	0	0	0	0	0	0	0	0	0	CATCGTGTGGC	part of a light responsive element
	I-box	0	3	1	0	0	0	1	0	0	2	1	0	1	0	0	2	1	0	1	0	0	0	2	0	0	1	0	0	0	2	0	1	gGATAAGGTG	part of a light responsive element
	LAMP-element	0	2	0	0	0	0	0	0	0	0	0	1	0	0	0	0	1	1	0	0	0	0	0	0	1	0	0	0	0	0	0	0	CCTTATCCA	part of a light responsive element
	L-box	0	0	0	0	0	0	0	0	0	0	0	0	0	0	0	0	0	1	0	0	0	0	0	0	0	0	0	0	0	0	0	0	ATCCCACCTAC	part of a light responsive element
	MRE	0	0	0	0	1	0	0	0	0	0	0	1	0	0	1	0	0	0	0	0	0	0	0	2	0	0	1	0	0	0	0	0	AACCTAA	MYB binding site involved in light responsiveness
	Sp1	0	0	2	0	0	0	1	1	3	0	4	3	4	4	6	2	0	2	0	1	0	0	2	2	1	0	1	4	1	1	1	1	GGGCGG	light responsive element
	TCCC-motif	0	1	2	0	0	1	0	1	2	2	1	0	0	0	0	0	0	0	0	1	0	0	1	0	1	0	0	0	0	0	0	1	TCTCCCT	part of a light responsive element
	TCT-motif	0	0	0	0	0	0	0	0	0	1	0	1	0	0	1	0	1	1	0	1	0	0	0	0	0	1	0	0	0	0	1	1	TCTTAC	part of a light responsive element
Unknown Function	AAGAA-motif	0	4	0	1	1	0	0	0	0	1	1	0	0	1	2	1	0	2	0	0	1	0	1	2	0	2	1	8	7	3	0	2	GAAAGAA	Unknown Function
	AP-1	0	0	0	0	0	0	0	0	0	0	0	0	0	0	0	0	0	0	0	1	0	0	0	0	0	0	0	0	0	0	1	0	TGAGTTAG	Unknown Function
	ACTCATCCT sequence	0	0	1	0	0	0	0	0	0	0	0	0	0	0	0	0	0	0	0	0	0	0	0	0	0	0	0	0	0	0	0	0	ACTCATCCT	Unknown Function
	AT~ABRE	0	0	0	0	0	0	0	0	0	0	0	0	0	0	0	0	0	0	0	1	0	1	0	0	0	0	0	0	0	0	0	0	TACGTGTC	Unknown Function
	AT~TATA-box	0	4	2	3	3	0	0	2	0	2	0	4	0	3	4	1	2	4	2	2	2	5	2	0	1	2	6	2	4	4	2	4	TATATA	Unknown Function
	CTAG-motif	1	0	1	0	0	1	0	0	0	0	0	0	0	0	0	0	0	0	1	0	0	0	0	0	0	0	0	0	0	0	0	0	ACTAGCAGAA	Unknown Function
	DRE1	0	0	0	0	1	0	1	0	0	1	0	0	0	0	0	0	2	0	1	1	0	0	0	0	0	0	0	2	0	1	0	0	ACCGAGA	Unknown Function
	F-box	0	0	0	0	0	0	0	0	0	0	0	0	0	0	0	0	0	0	0	0	0	0	0	1	0	0	0	0	0	0	0	0	CTATTCTCATT	Unknown Function
	NON	1	0	0	0	0	0	0	0	0	0	0	0	0	0	0	0	0	0	0	0	0	0	0	0	0	0	0	1	0	0	0	0	CAACGGCCACG	Unknown Function
	plant_AP-2-like	0	0	0	0	0	0	0	0	1	0	0	0	0	0	0	0	0	1	0	0	0	0	0	0	0	0	0	0	0	0	0	0	CGACCAGG	Unknown Function
	TATA-box	16	33	14	17	26	10	4	23	7	14	10	47	11	14	35	15	14	35	54	10	25	24	6	9	11	21	36	31	28	18	16	28	TACAAAA	Unknown Function
	TATA	0	1	0	0	0	1	0	0	0	0	0	0	0	0	0	0	0	0	2	0	0	0	0	0	0	0	0	0	0	0	0	0	TATAAAAT	Unknown Function
	TCA	3	0	0	0	1	0	1	0	0	0	0	0	0	1	0	1	0	0	0	0	1	0	3	0	2	1	0	0	0	0	1	0	TCATCTTCAT	Unknown Function
	WRE3	0	2	3	1	0	2	0	2	2	2	1	0	2	1	0	1	2	5	1	2	2	1	3	0	0	1	0	1	0	1	1	0	CCACCT	Unknown Function
	Unnamed__1	5	3	1	3	1	1	9	1	5	2	8	4	5	5	5	10	3	5	2	2	3	3	8	7	5	6	1	7	4	4	2	1	CGTGG	Unknown Function
	Unnamed__2	2	0	0	0	2	0	3	1	1	0	0	1	0	2	0	1	0	0	0	1	1	0	0	2	0	2	0	4	1	0	0	0	CCCCGG	Unknown Function
	Unnamed__4	14	11	23	19	14	29	22	17	33	30	26	19	26	28	13	29	25	28	17	21	17	20	26	22	11	15	26	22	13	19	13	11	CTCC	Unknown Function
	Unnamed__6	0	0	0	1	0	0	0	0	0	0	0	0	0	0	0	0	0	0	0	0	0	0	0	0	0	0	0	0	0	0	0	0	taTAAATATct	Unknown Function
	Unnamed__8	0	0	0	0	0	0	0	0	0	0	0	0	0	0	0	1	0	0	1	0	0	0	1	0	0	0	0	1	1	0	0	0	TCCACGTAGA	Unknown Function
	Unnamed__10	0	0	0	0	0	0	0	0	0	0	0	0	0	0	0	1	0	0	1	0	0	0	1	0	0	0	0	1	1	0	0	0	TCCACGTAGA	Unknown Function
	Unnamed__12	0	0	0	0	0	0	0	0	0	0	0	0	0	0	1	1	0	0	1	0	0	0	1	0	0	0	0	1	1	0	0	0	TCCACGTAGA	Unknown Function
	Unnamed__14	0	0	0	0	0	0	0	0	0	0	0	0	0	0	0	1	0	0	1	0	0	0	1	0	0	0	0	1	1	0	0	0	TCCACGTAGA	Unknown Function
	Unnamed__16	0	0	0	0	0	1	0	0	0	0	1	0	0	1	0	0	0	0	0	0	0	0	0	0	0	0	0	0	0	0	0	0	GCTGCCCGTC	Unknown Function
		156	127	126	131	116	138	117	141	116	140	131	170	141	121	142	144	109	172	164	141	161	134	148	146	100	157	133	174	152	149	135	134

## Sheet: Table S6
Table S6. Prediction of the interaction network of SiVQ proteins with SiWRKY transcription factors using the STRING online program.
		predicted interactions			other			known interactions
node1	node2	neighborhood_on_chromosome	gene_fusion	phylogenetic_cooccurrence	homology	coexpression	automated_textmining	experimentally_determined_interaction	database_annotated	combined_score
SiVQ03	SiWRKY61	0	0	0	0	0.048	0.116	0.6	0.373	0.76
SiVQ03	SiVQ20	0	0	0	0	0	0	0	0.626	0.626
SiVQ03	SiVQ14	0	0	0	0	0	0	0	0.534	0.534
SiVQ03	SiVQ24	0	0	0	0	0	0	0	0.676	0.676
SiVQ03	SiWRKY70	0	0	0	0	0	0.173	0	0.331	0.423
SiVQ03	SiWRKY66	0	0	0	0	0	0.173	0	0.331	0.423
SiVQ03	SiWRKY16	0	0	0	0	0	0.173	0	0.331	0.423
SiVQ03	SiWRKY9	0	0	0	0	0	0.173	0	0.331	0.423
SiVQ03	SiWRKY82	0	0	0	0	0.048	0.116	0	0.373	0.426
SiVQ03	SiVQ12	0	0	0	0	0.056	0.125	0	0.409	0.469
SiVQ03	SiVQ27	0	0	0	0	0.056	0.125	0	0.409	0.469
SiVQ03	SiVQ08	0	0	0	0	0	0	0	0.534	0.534
SiVQ03	SiWRKY34	0	0	0	0	0	0	0	0.6	0.6
SiVQ03	SiVQ32	0	0	0	0	0	0	0	0.604	0.604
SiVQ03	SiWRKY32	0	0	0	0	0.048	0.116	0.6	0.373	0.76
SiVQ03	SiWRKY33	0	0	0	0	0.048	0.116	0.6	0.373	0.76
SiVQ04	SiWRKY61	0	0	0	0	0	0	0.6	0	0.6
SiVQ04	SiWRKY32	0	0	0	0	0	0	0.6	0	0.6
SiVQ04	SiWRKY33	0	0	0	0	0	0	0.6	0	0.6
SiVQ05	SiVQ12	0	0	0	0	0	0	0	0.576	0.576
SiVQ05	SiVQ27	0	0	0	0	0	0	0	0.576	0.576
SiVQ07	SiWRKY61	0	0	0	0	0	0	0.6	0	0.6
SiVQ07	SiWRKY32	0	0	0	0	0	0	0.6	0	0.6
SiVQ07	SiWRKY33	0	0	0	0	0	0	0.6	0	0.6
SiVQ08	SiVQ16	0	0	0	0	0	0	0	0.602	0.602
SiVQ08	SiVQ23	0	0	0	0	0	0	0	0.534	0.534
SiVQ08	SiVQ24	0	0	0	0	0	0	0	0.768	0.768
SiVQ08	SiVQ21	0	0	0	0	0	0	0	0.534	0.534
SiVQ08	SiVQ03	0	0	0	0	0	0	0	0.534	0.534
SiVQ08	SiVQ09	0	0	0	0	0	0	0	0.59	0.59
SiVQ08	SiVQ30	0	0	0	0	0	0	0	0.646	0.646
SiVQ09	SiVQ14	0	0	0	0	0	0	0	0.59	0.59
SiVQ09	SiVQ16	0	0	0	0	0.068	0	0	0.511	0.524
SiVQ09	SiVQ24	0	0	0	0	0.043	0	0	0.769	0.769
SiVQ09	SiVQ08	0	0	0	0	0	0	0	0.59	0.59
SiVQ11	SiVQ20	0	0	0	0	0	0	0	0.545	0.545
SiVQ11	SiVQ32	0	0	0	0	0	0	0	0.512	0.512
SiVQ11	SiWRKY11	0	0	0	0	0	0	0	0.616	0.616
SiVQ12	SiWRKY54	0	0	0	0	0.048	0.481	0	0.171	0.554
SiVQ12	SiWRKY42	0	0	0	0	0.861	0	0	0	0.861
SiVQ12	SiVQ23	0	0	0	0	0.056	0.125	0	0.409	0.469
SiVQ12	SiVQ22	0	0	0	0	0	0	0	0.576	0.576
SiVQ12	SiVQ21	0	0	0	0	0.056	0.125	0	0.409	0.469
SiVQ12	SiVQ03	0	0	0	0	0.056	0.125	0	0.409	0.469
SiVQ12	SiWRKY34	0	0	0	0	0.049	0	0	0.442	0.446
SiVQ12	SiWRKY29	0	0	0	0	0.048	0.481	0	0.171	0.554
SiVQ12	SiVQ05	0	0	0	0	0	0	0	0.576	0.576
SiVQ12	SiVQ30	0	0	0	0	0.047	0.202	0	0.768	0.808
SiVQ12	SiWRKY17	0	0	0	0	0.112	0.807	0	0.059	0.824
SiVQ14	SiVQ03	0	0	0	0	0	0	0	0.534	0.534
SiVQ14	SiVQ21	0	0	0	0	0	0	0	0.534	0.534
SiVQ14	SiVQ23	0	0	0	0	0	0	0	0.534	0.534
SiVQ14	SiVQ09	0	0	0	0	0	0	0	0.59	0.59
SiVQ14	SiVQ16	0	0	0	0	0	0	0	0.602	0.602
SiVQ14	SiVQ30	0	0	0	0	0	0	0	0.646	0.646
SiVQ14	SiVQ24	0	0	0	0	0	0	0	0.768	0.768
SiVQ15	SiWRKY61	0	0	0	0	0	0	0.6	0	0.6
SiVQ15	SiWRKY33	0	0	0	0	0	0	0.6	0	0.6
SiVQ15	SiWRKY32	0	0	0	0	0	0	0.6	0	0.6
SiVQ16	SiWRKY45	0	0	0	0	0.127	0.136	0	0.5	0.589
SiVQ16	SiWRKY50	0	0	0	0	0.098	0.136	0	0.5	0.576
SiVQ16	SiVQ20	0	0	0	0	0	0	0	0.59	0.59
SiVQ16	SiVQ14	0	0	0	0	0	0	0	0.602	0.602
SiVQ16	SiVQ09	0	0	0	0	0.068	0	0	0.511	0.524
SiVQ16	SiWRKY28	0	0	0	0	0.098	0.136	0	0.5	0.576
SiVQ16	SiVQ32	0	0	0	0	0.044	0	0	0.59	0.591
SiVQ16	SiWRKY22	0	0	0	0	0.134	0.136	0	0.5	0.593
SiVQ16	SiVQ08	0	0	0	0	0	0	0	0.602	0.602
SiVQ16	SiVQ24	0	0	0	0	0	0	0	0.61	0.61
SiVQ16	SiVQ30	0	0	0	0	0	0	0	0.649	0.649
SiVQ16	SiWRKY33	0	0	0	0	0.57	0.066	0	0.236	0.666
SiVQ17	SiVQ32	0	0	0	0	0	0	0	0.512	0.512
SiVQ17	SiVQ20	0	0	0	0	0	0	0	0.545	0.545
SiVQ17	SiWRKY11	0	0	0	0	0	0	0	0.616	0.616
SiVQ19	SiVQ32	0	0	0	0	0	0	0	0.512	0.512
SiVQ19	SiVQ20	0	0	0	0	0	0	0	0.545	0.545
SiVQ19	SiWRKY11	0	0	0	0	0	0	0	0.768	0.768
SiVQ20	SiWRKY61	0	0	0	0	0.041	0.166	0	0.604	0.655
SiVQ20	SiVQ19	0	0	0	0	0	0	0	0.545	0.545
SiVQ20	SiVQ17	0	0	0	0	0	0	0	0.545	0.545
SiVQ20	SiWRKY17	0	0	0	0	0.041	0.122	0	0.42	0.468
SiVQ20	SiVQ30	0	0	0	0	0	0	0	0.478	0.478
SiVQ20	SiWRKY8	0	0	0	0	0.041	0.084	0	0.476	0.499
SiVQ20	SiWRKY95	0	0	0	0	0.041	0.084	0	0.476	0.499
SiVQ20	SiWRKY19	0	0	0	0	0.041	0.084	0	0.476	0.499
SiVQ20	SiVQ11	0	0	0	0	0	0	0	0.545	0.545
SiVQ20	SiVQ16	0	0	0	0	0	0	0	0.59	0.59
SiVQ20	SiVQ21	0	0	0	0	0	0	0	0.626	0.626
SiVQ20	SiVQ23	0	0	0	0	0	0	0	0.626	0.626
SiVQ20	SiVQ03	0	0	0	0	0	0	0	0.626	0.626
SiVQ20	SiWRKY33	0	0	0	0	0.041	0.166	0	0.604	0.655
SiVQ20	SiWRKY32	0	0	0	0	0.041	0.166	0	0.604	0.655
SiVQ20	SiWRKY82	0	0	0	0	0.041	0.166	0	0.604	0.655
SiVQ21	SiWRKY61	0	0	0	0	0.048	0.116	0.6	0.373	0.76
SiVQ21	SiVQ20	0	0	0	0	0	0	0	0.626	0.626
SiVQ21	SiVQ14	0	0	0	0	0	0	0	0.534	0.534
SiVQ21	SiVQ24	0	0	0	0	0	0	0	0.676	0.676
SiVQ21	SiWRKY70	0	0	0	0	0	0.173	0	0.331	0.423
SiVQ21	SiWRKY66	0	0	0	0	0	0.173	0	0.331	0.423
SiVQ21	SiWRKY9	0	0	0	0	0	0.173	0	0.331	0.423
SiVQ21	SiWRKY16	0	0	0	0	0	0.173	0	0.331	0.423
SiVQ21	SiWRKY82	0	0	0	0	0.048	0.116	0	0.373	0.426
SiVQ21	SiVQ27	0	0	0	0	0.056	0.125	0	0.409	0.469
SiVQ21	SiVQ12	0	0	0	0	0.056	0.125	0	0.409	0.469
SiVQ21	SiVQ08	0	0	0	0	0	0	0	0.534	0.534
SiVQ21	SiWRKY34	0	0	0	0	0	0	0	0.6	0.6
SiVQ21	SiVQ32	0	0	0	0	0	0	0	0.604	0.604
SiVQ21	SiWRKY33	0	0	0	0	0.048	0.116	0.6	0.373	0.76
SiVQ21	SiWRKY32	0	0	0	0	0.048	0.116	0.6	0.373	0.76
SiVQ22	SiVQ12	0	0	0	0	0	0	0	0.576	0.576
SiVQ22	SiVQ27	0	0	0	0	0	0	0	0.576	0.576
SiVQ23	SiWRKY61	0	0	0	0	0.048	0.116	0.6	0.373	0.76
SiVQ23	SiVQ20	0	0	0	0	0	0	0	0.626	0.626
SiVQ23	SiVQ14	0	0	0	0	0	0	0	0.534	0.534
SiVQ23	SiWRKY70	0	0	0	0	0	0.173	0	0.331	0.423
SiVQ23	SiWRKY66	0	0	0	0	0	0.173	0	0.331	0.423
SiVQ23	SiWRKY16	0	0	0	0	0	0.173	0	0.331	0.423
SiVQ23	SiWRKY9	0	0	0	0	0	0.173	0	0.331	0.423
SiVQ23	SiWRKY82	0	0	0	0	0.048	0.116	0	0.373	0.426
SiVQ23	SiVQ12	0	0	0	0	0.056	0.125	0	0.409	0.469
SiVQ23	SiVQ27	0	0	0	0	0.056	0.125	0	0.409	0.469
SiVQ23	SiVQ08	0	0	0	0	0	0	0	0.534	0.534
SiVQ23	SiWRKY34	0	0	0	0	0	0	0	0.6	0.6
SiVQ23	SiVQ32	0	0	0	0	0	0	0	0.604	0.604
SiVQ23	SiVQ24	0	0	0	0	0	0	0	0.676	0.676
SiVQ23	SiWRKY32	0	0	0	0	0.048	0.116	0.6	0.373	0.76
SiVQ23	SiWRKY33	0	0	0	0	0.048	0.116	0.6	0.373	0.76
SiVQ24	SiVQ14	0	0	0	0	0	0	0	0.768	0.768
SiVQ24	SiVQ16	0	0	0	0	0	0	0	0.61	0.61
SiVQ24	SiVQ23	0	0	0	0	0	0	0	0.676	0.676
SiVQ24	SiVQ03	0	0	0	0	0	0	0	0.676	0.676
SiVQ24	SiVQ21	0	0	0	0	0	0	0	0.676	0.676
SiVQ24	SiVQ08	0	0	0	0	0	0	0	0.768	0.768
SiVQ24	SiVQ09	0	0	0	0	0.043	0	0	0.769	0.769
SiVQ24	SiVQ30	0	0	0	0	0	0	0	0.883	0.883
SiVQ27	SiWRKY54	0	0	0	0	0.048	0.481	0	0.171	0.554
SiVQ27	SiWRKY42	0	0	0	0	0.864	0	0	0	0.864
SiVQ27	SiVQ23	0	0	0	0	0.056	0.125	0	0.409	0.469
SiVQ27	SiVQ22	0	0	0	0	0	0	0	0.576	0.576
SiVQ27	SiVQ21	0	0	0	0	0.056	0.125	0	0.409	0.469
SiVQ27	SiVQ03	0	0	0	0	0.056	0.125	0	0.409	0.469
SiVQ27	SiWRKY34	0	0	0	0	0.05	0	0	0.565	0.569
SiVQ27	SiWRKY29	0	0	0	0	0.048	0.481	0	0.171	0.554
SiVQ27	SiWRKY17	0	0	0	0	0.112	0.807	0	0.059	0.824
SiVQ27	SiVQ05	0	0	0	0	0	0	0	0.576	0.576
SiVQ27	SiVQ30	0	0	0	0	0.047	0.202	0	0.768	0.808
SiVQ30	SiWRKY54	0	0	0	0	0.045	0.633	0	0	0.634
SiVQ30	SiVQ20	0	0	0	0	0	0	0	0.478	0.478
SiVQ30	SiVQ14	0	0	0	0	0	0	0	0.646	0.646
SiVQ30	SiVQ16	0	0	0	0	0	0	0	0.649	0.649
SiVQ30	SiVQ24	0	0	0	0	0	0	0	0.883	0.883
SiVQ30	SiWRKY34	0	0	0	0	0	0	0	0.524	0.524
SiVQ30	SiVQ12	0	0	0	0	0.047	0.202	0	0.768	0.808
SiVQ30	SiVQ08	0	0	0	0	0	0	0	0.646	0.646
SiVQ30	SiWRKY29	0	0	0	0	0.045	0.633	0	0	0.634
SiVQ30	SiVQ32	0	0	0	0	0	0	0	0.582	0.582
SiVQ30	SiVQ27	0	0	0	0	0.047	0.202	0	0.768	0.808
SiVQ32	SiWRKY61	0	0	0	0	0.05	0.209	0	0.607	0.678
SiVQ32	SiVQ19	0	0	0	0	0	0	0	0.512	0.512
SiVQ32	SiVQ17	0	0	0	0	0	0	0	0.512	0.512
SiVQ32	SiVQ16	0	0	0	0	0.044	0	0	0.59	0.591
SiVQ32	SiVQ23	0	0	0	0	0	0	0	0.604	0.604
SiVQ32	SiVQ21	0	0	0	0	0	0	0	0.604	0.604
SiVQ32	SiWRKY7	0	0	0	0	0.043	0	0	0.42	0.421
SiVQ32	SiWRKY3	0	0	0	0	0.054	0	0	0.457	0.464
SiVQ32	SiVQ03	0	0	0	0	0	0	0	0.604	0.604
SiVQ32	SiWRKY32	0	0	0	0	0.05	0.209	0	0.607	0.678
SiVQ32	SiWRKY33	0	0	0	0	0.05	0.209	0	0.607	0.678
SiVQ32	SiWRKY34	0	0	0	0	0.162	0	0	0.652	0.695
SiVQ32	SiWRKY31	0	0	0	0	0.129	0	0	0.392	0.447
SiVQ32	SiVQ11	0	0	0	0	0	0	0	0.512	0.512
SiVQ32	SiWRKY19	0	0	0	0	0.041	0.084	0	0.481	0.504
SiVQ32	SiWRKY82	0	0	0	0	0.05	0.209	0	0.607	0.678
SiVQ32	SiWRKY89	0	0	0	0	0.085	0.084	0	0.38	0.434
SiVQ32	SiWRKY17	0	0	0	0	0.046	0.695	0	0.502	0.842
SiVQ32	SiWRKY8	0	0	0	0	0.041	0.084	0	0.481	0.504
SiVQ32	SiWRKY18	0	0	0	0	0.129	0	0	0.392	0.447
SiVQ32	SiWRKY14	0	0	0	0	0.054	0	0	0.457	0.464
SiVQ32	SiWRKY15	0	0	0	0	0.054	0	0	0.457	0.464
SiVQ32	SiWRKY95	0	0	0	0	0.041	0.084	0	0.481	0.504
SiVQ32	SiVQ30	0	0	0	0	0	0	0	0.582	0.582
SiWRKY1	SiWRKY97	0	0	0	0	0	0	0	0.607	0.607
SiWRKY14	SiWRKY15	0	0	0	0.873	0.864	0	0	0.769	0.877
SiWRKY14	SiWRKY34	0	0	0	0.597	0.167	0	0	0.769	0.421
SiWRKY15	SiWRKY14	0	0	0	0.873	0.864	0	0	0.769	0.877
SiWRKY16	SiWRKY66	0	0	0	0.94	0	0	0.8	0	0.8
SiWRKY16	SiWRKY70	0	0	0	0.788	0	0	0.8	0	0.8
SiWRKY18	SiWRKY97	0	0	0	0	0	0	0	0.424	0.424
SiWRKY23	SiWRKY59	0	0	0	0	0	0	0	0.589	0.589
SiWRKY23	SiWRKY97	0	0	0	0	0	0	0	0.607	0.607
SiWRKY23	SiWRKY98	0	0	0	0	0	0	0	0.607	0.607
SiWRKY24	SiWRKY31	0	0	0	0	0	0	0	0.511	0.511
SiWRKY26	SiWRKY97	0	0	0	0	0	0	0	0.51	0.51
SiWRKY26	SiWRKY98	0	0	0	0	0	0	0	0.51	0.51
SiWRKY3	SiWRKY65	0	0	0	0	0.116	0	0	0.375	0.423
SiWRKY31	SiWRKY24	0	0	0	0	0	0	0	0.511	0.511
SiWRKY31	SiWRKY97	0	0	0	0	0	0	0	0.613	0.613
SiWRKY31	SiWRKY98	0	0	0	0	0	0	0	0.613	0.613
SiWRKY32	SiWRKY33	0	0	0	0.902	0	0	0.8	0	0.8
SiWRKY32	SiWRKY61	0	0	0	0.943	0.21	0	0.8	0.163	0.836
SiWRKY33	SiWRKY32	0	0	0	0.902	0	0	0.8	0	0.8
SiWRKY33	SiWRKY61	0	0	0	0.925	0.131	0	0.8	0.589	0.826
SiWRKY34	SiWRKY14	0	0	0	0.597	0.167	0	0	0.769	0.421
SiWRKY34	SiWRKY9	0	0	0	0	0	0	0	0.439	0.439
SiWRKY40	SiWRKY97	0	0	0	0	0	0	0	0.514	0.514
SiWRKY40	SiWRKY98	0	0	0	0	0	0	0	0.514	0.514
SiWRKY41	SiWRKY46	0	0	0	0.753	0	0	0.8	0	0.8
SiWRKY41	SiWRKY97	0	0	0	0	0	0	0	0.514	0.514
SiWRKY42	SiWRKY61	0	0	0	0.662	0.5	0	0	0.178	0.524
SiWRKY42	SiWRKY82	0	0	0	0.637	0.5	0	0	0.178	0.525
SiWRKY45	SiWRKY75	0	0	0	0	0	0	0	0.447	0.447
SiWRKY45	SiWRKY78	0	0	0	0	0	0	0	0.59	0.59
SiWRKY45	SiWRKY79	0	0	0	0	0	0	0	0.447	0.447
SiWRKY46	SiWRKY41	0	0	0	0.753	0	0	0.8	0	0.8
SiWRKY46	SiWRKY97	0	0	0	0	0	0	0	0.607	0.607
SiWRKY46	SiWRKY98	0	0	0	0	0	0	0	0.607	0.607
SiWRKY54	SiWRKY78	0	0	0	0	0	0	0	0.599	0.599
SiWRKY59	SiWRKY23	0	0	0	0	0	0	0	0.589	0.589
SiWRKY6	SiWRKY97	0	0	0	0	0	0	0	0.606	0.606
SiWRKY60	SiWRKY9	0	0	0	0	0	0	0	0.414	0.414
SiWRKY61	SiWRKY32	0	0	0	0.943	0.21	0	0.8	0.163	0.836
SiWRKY61	SiWRKY33	0	0	0	0.925	0.131	0	0.8	0.589	0.826
SiWRKY61	SiWRKY42	0	0	0	0.662	0.5	0	0	0.178	0.524
SiWRKY61	SiWRKY65	0	0	0	0.599	0.751	0	0	0.182	0.765
SiWRKY65	SiWRKY3	0	0	0	0	0.116	0	0	0.375	0.423
SiWRKY65	SiWRKY61	0	0	0	0.599	0.751	0	0	0.182	0.765
SiWRKY65	SiWRKY82	0	0	0	0.595	0.751	0	0	0.182	0.765
SiWRKY66	SiWRKY16	0	0	0	0.94	0	0	0.8	0	0.8
SiWRKY66	SiWRKY70	0	0	0	0.83	0	0	0.8	0	0.8
SiWRKY70	SiWRKY16	0	0	0	0.788	0	0	0.8	0	0.8
SiWRKY70	SiWRKY66	0	0	0	0.83	0	0	0.8	0	0.8
SiWRKY71	SiWRKY97	0	0	0	0	0	0	0	0.606	0.606
SiWRKY75	SiWRKY45	0	0	0	0	0	0	0	0.447	0.447
SiWRKY77	SiWRKY9	0	0	0	0	0	0	0	0.51	0.51
SiWRKY78	SiWRKY45	0	0	0	0	0	0	0	0.59	0.59
SiWRKY78	SiWRKY54	0	0	0	0	0	0	0	0.599	0.599
SiWRKY78	SiWRKY97	0	0	0	0	0	0	0	0.517	0.517
SiWRKY78	SiWRKY98	0	0	0	0	0	0	0	0.517	0.517
SiWRKY79	SiWRKY45	0	0	0	0	0	0	0	0.447	0.447
SiWRKY82	SiWRKY42	0	0	0	0.637	0.5	0	0	0.178	0.525
SiWRKY82	SiWRKY65	0	0	0	0.595	0.751	0	0	0.182	0.765
SiWRKY9	SiWRKY34	0	0	0	0	0	0	0	0.439	0.439
SiWRKY9	SiWRKY60	0	0	0	0	0	0	0	0.414	0.414
SiWRKY9	SiWRKY77	0	0	0	0	0	0	0	0.51	0.51
SiWRKY9	SiWRKY97	0	0	0	0	0	0	0	0.606	0.606
SiWRKY9	SiWRKY98	0	0	0	0	0	0	0	0.606	0.606
SiWRKY92	SiWRKY97	0	0	0	0	0	0	0	0.606	0.606
SiWRKY97	SiWRKY1	0	0	0	0	0	0	0	0.607	0.607
SiWRKY97	SiWRKY100	0	0	0	0	0	0	0	0.606	0.606
SiWRKY97	SiWRKY18	0	0	0	0	0	0	0	0.424	0.424
SiWRKY97	SiWRKY23	0	0	0	0	0	0	0	0.607	0.607
SiWRKY97	SiWRKY26	0	0	0	0	0	0	0	0.51	0.51
SiWRKY97	SiWRKY31	0	0	0	0	0	0	0	0.613	0.613
SiWRKY97	SiWRKY40	0	0	0	0	0	0	0	0.514	0.514
SiWRKY97	SiWRKY41	0	0	0	0	0	0	0	0.514	0.514
SiWRKY97	SiWRKY46	0	0	0	0	0	0	0	0.607	0.607
SiWRKY97	SiWRKY6	0	0	0	0	0	0	0	0.606	0.606
SiWRKY97	SiWRKY71	0	0	0	0	0	0	0	0.606	0.606
SiWRKY97	SiWRKY78	0	0	0	0	0	0	0	0.517	0.517
SiWRKY97	SiWRKY9	0	0	0	0	0	0	0	0.606	0.606
SiWRKY97	SiWRKY92	0	0	0	0	0	0	0	0.606	0.606
SiWRKY98	SiWRKY23	0	0	0	0	0	0	0	0.607	0.607
SiWRKY98	SiWRKY26	0	0	0	0	0	0	0	0.51	0.51
SiWRKY98	SiWRKY31	0	0	0	0	0	0	0	0.613	0.613
SiWRKY98	SiWRKY40	0	0	0	0	0	0	0	0.514	0.514
SiWRKY98	SiWRKY46	0	0	0	0	0	0	0	0.607	0.607
SiWRKY98	SiWRKY78	0	0	0	0	0	0	0	0.517	0.517
SiWRKY98	SiWRKY9	0	0	0	0	0	0	0	0.606	0.606
SiWRKY100	SiWRKY97	0	0	0	0	0	0	0	0.606	0.606
